# Supplementary material for: The Predictive Effect of Health Examination in the Incidence of Diabetes Mellitus in Chinese Adults: A Population-Based Cohort Study
Source: Hindawi journal article supplement (doi:10.1155/2021/3552080), 2021-08-11

**A****3-year incidence ROC**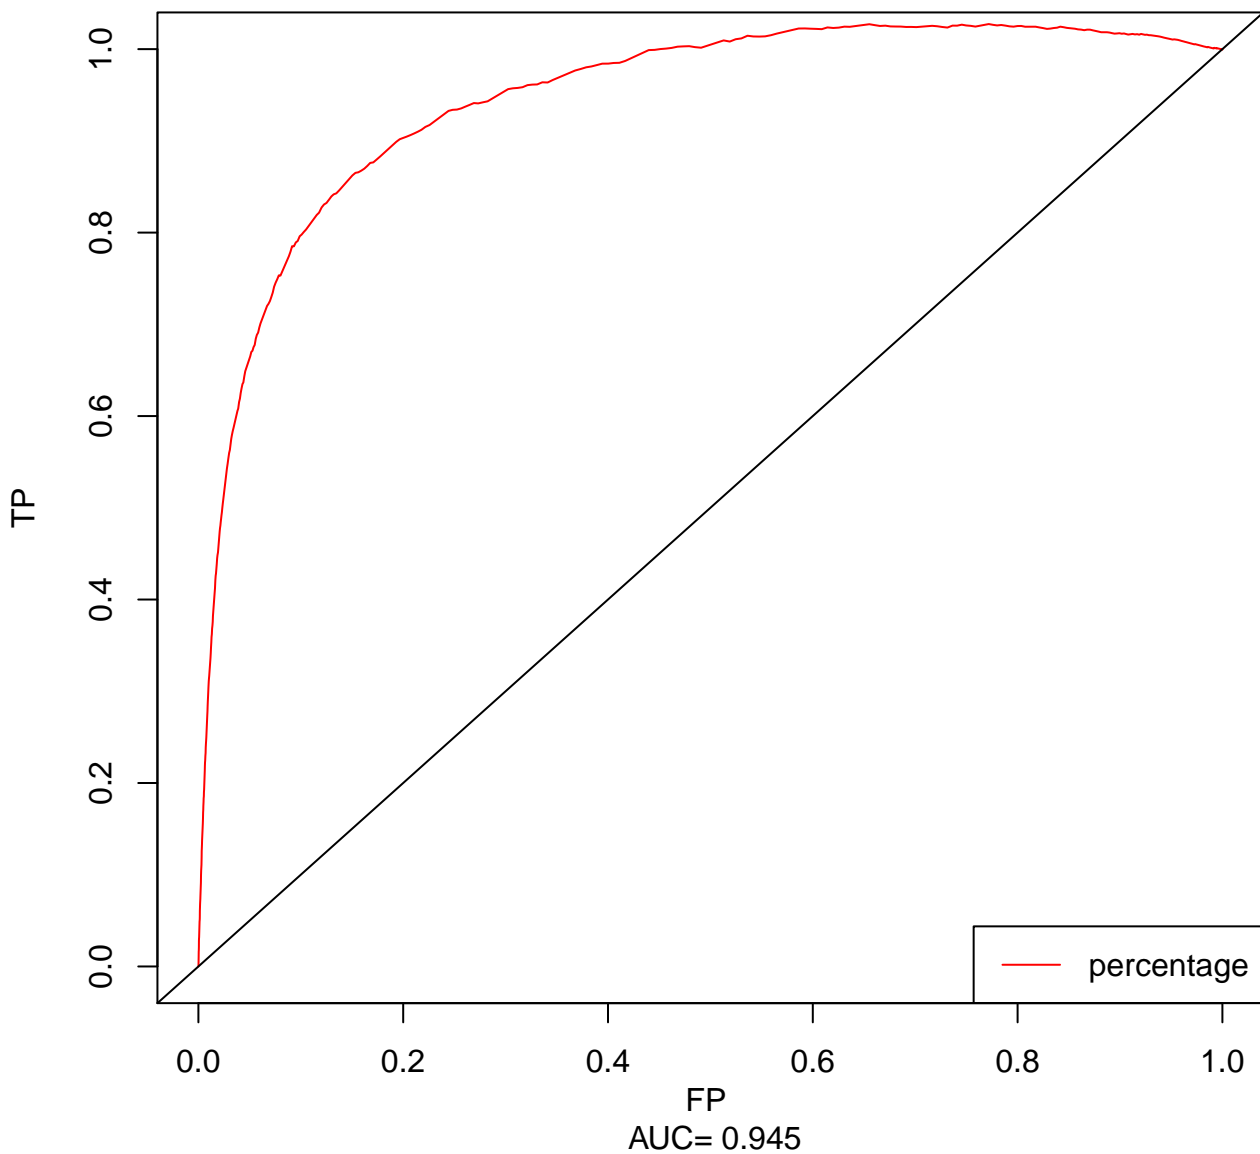**B****4-year incidence ROC**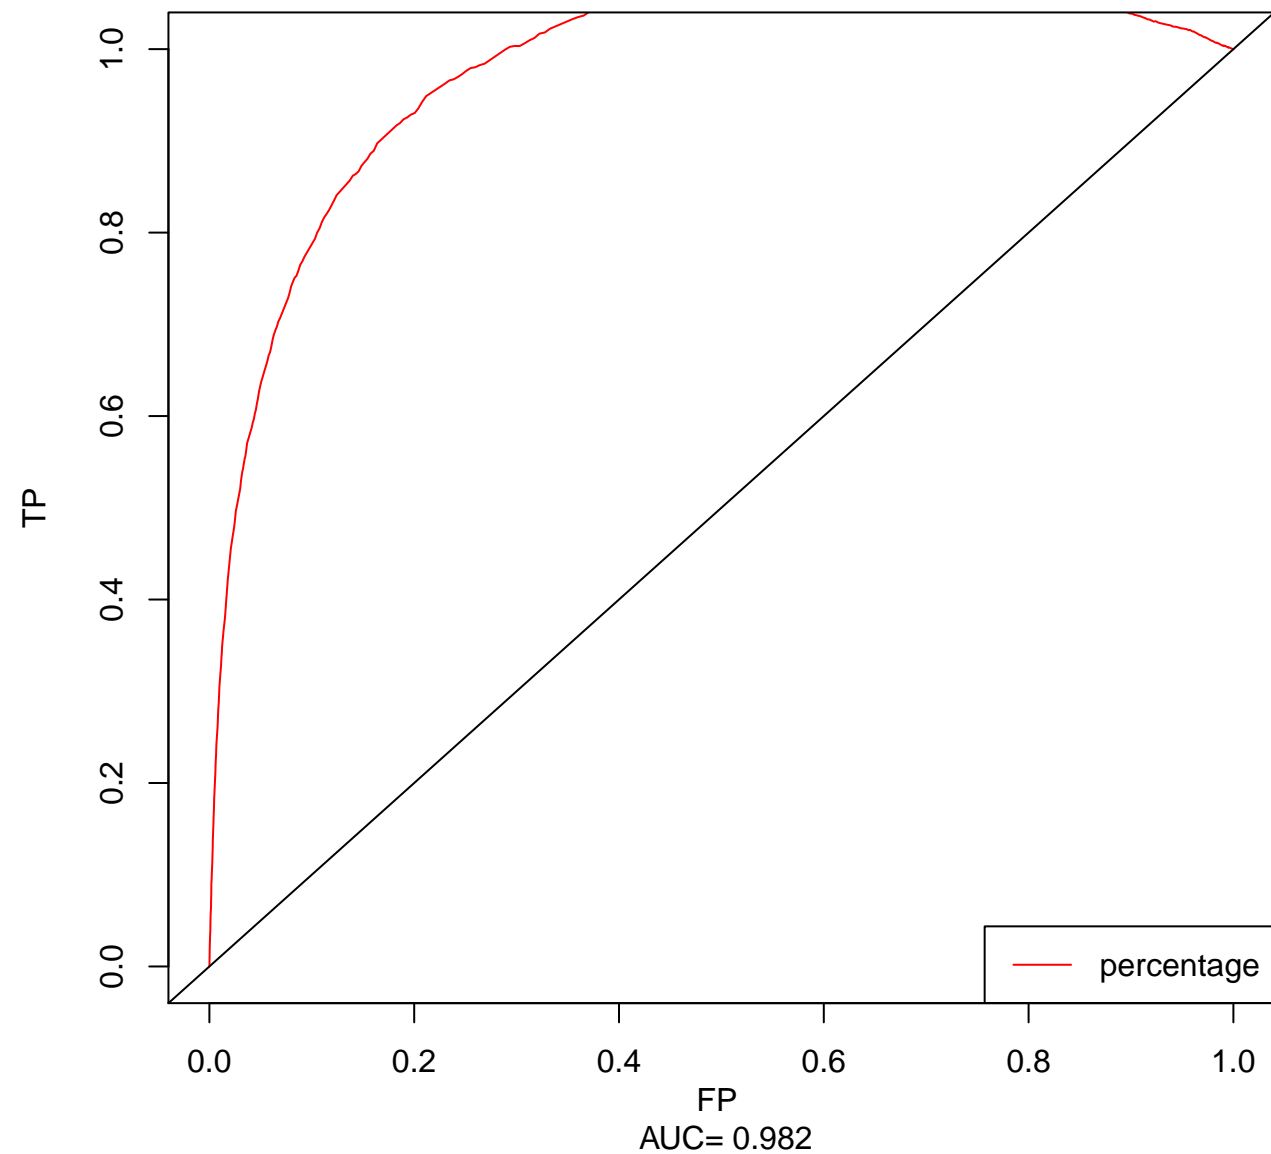

Supplement: f2 [file 3552080.f2.pdf]
